# Supplementary material
Source: MDPI journal article supplement (https://www.mdpi.com/2673-7116/3/4/35)
Supplement: s1 [file s1]

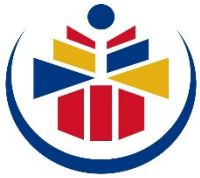

**Tshwane University  
of Technology**

*We empower people*

**FACULTY OF MANAGEMENT SCIENCE**

---

**DEPARTMENT OF MANAGEMENT AND  
ENTREPRENEURSHIP**

## **INFORMATION LEAFLET**

### **STUDY QUESTIONNAIRE**

**RESEARCH TITLE: A CRITICAL ANALYSIS OF POST-COVID-19 ENTREPRENEURIAL  
INTENTIONS AMONG YOUTHS IN GAUTENG, SOUTH AFRICA**

**Researcher:** Mr Neo Titus Lekutle, Doctor of Management Sciences student

**Student number:** 222030170

**Email:** neo.lekutle@yahoo.co.za

**Cell number:** 071 886 9197

Dear Potential Participant,

Thank you for agreeing to participate in this study as per the above title. This questionnaire aims to collect data as part of my Doctoral degree in entrepreneurship at the Tshwane University of Technology. The research intends to collect data based on the Informed Consent Form (ICF) that you have voluntarily signed.

## **General Instructions**

Before you begin, make sure you understand the following instructions:

- i. When evaluating the questions, please respond from your perspective as honestly as possible.
- ii. Please respond to the items (or questions) by making a tick (✓) what you consider the answer or filling in the blanks.
- iii. This questionnaire consists of three sections (A, B and C). Please complete all sections, and do not leave any questions unanswered.
- iv. You are requested to apply the scale provided for each question.
- v. Please note that your name is not required, nor is it requested, hence, confidentiality is assured.

*Please find the questionnaire on the next page.*

## SECTION A: DEMOGRAPHIC DATA

Questionnaire #.....

Kindly indicate your answer by placing a tick (✓) in the space corresponding to your choice of answer for each of the following questions:

### A1. What is your gender?

|           |  |
|-----------|--|
| 1. Male   |  |
| 2. Female |  |

### A2. What is your age in years?

|                   |  |
|-------------------|--|
| 1. 18 to 20 years |  |
| 2. 21 to 23 years |  |
| 3. 24 to 26 years |  |
| 4. 27 to 29 years |  |
| 5. 30 to 32 years |  |
| 6. 33 to 35 years |  |

### A3. What is your highest level of education?

|                                                                      |  |
|----------------------------------------------------------------------|--|
| 1. NQF Level 4 (Grade 12 or Matric level) or less                    |  |
| 2. NQF Level 5 (N6 Level Certificate)                                |  |
| 3. NQF Level 6 (National Diploma)                                    |  |
| 4. NQF Level 7 (Bachelor's degree, BTech degree or Advanced Diploma) |  |
| 5. NQF Level 8 (Honours degree or Postgraduate Diploma)              |  |
| 6. NQF Level 9 (Master's degree)                                     |  |
| 7. NQF Level 10 (Doctoral degree)                                    |  |
| 8. Other                                                             |  |

#### A4. Are you currently self-employed?

|     |  |
|-----|--|
| Yes |  |
| No  |  |

### SECTION B: VARIABLES

---

#### B1. ENTREPRENEURIAL LEADERSHIP

|                                                                                                                                                                                                                                                     |                                                                                        |   |   |   |   |   |
|-----------------------------------------------------------------------------------------------------------------------------------------------------------------------------------------------------------------------------------------------------|----------------------------------------------------------------------------------------|---|---|---|---|---|
| Read each of the following items carefully and decide how true the statement describes you.<br><b>Instructions:</b> Please choose only one answer to each question.<br>(1= strongly disagree, 2= disagree, 3= neutral, 4= agree, 5= strongly agree) |                                                                                        |   |   |   |   |   |
| B1.1                                                                                                                                                                                                                                                | I spend time on new business development.                                              | 1 | 2 | 3 | 4 | 5 |
| B1.2                                                                                                                                                                                                                                                | I point out competitor weaknesses and how we could exploit them.                       | 1 | 2 | 3 | 4 | 5 |
| B1.3                                                                                                                                                                                                                                                | I listen and act upon customer complaints.                                             | 1 | 2 | 3 | 4 | 5 |
| B1.4                                                                                                                                                                                                                                                | Challenges us to think about new and better ways of doing our work.                    | 1 | 2 | 3 | 4 | 5 |
| B1.5                                                                                                                                                                                                                                                | Passionately looks for new ways to grow the business.                                  | 1 | 2 | 3 | 4 | 5 |
| B1.6                                                                                                                                                                                                                                                | I make sure that we keep the customer in mind when making changes in the organisation. | 1 | 2 | 3 | 4 | 5 |

#### B2. PERCEIVED COVID-19 ENVIRONMENT

|                                                                                                                                                                                                                                                     |                                                                                         |   |   |   |   |   |
|-----------------------------------------------------------------------------------------------------------------------------------------------------------------------------------------------------------------------------------------------------|-----------------------------------------------------------------------------------------|---|---|---|---|---|
| Read each of the following items carefully and decide how true the statement describes you.<br><b>Instructions:</b> Please choose only one answer to each question.<br>(1= strongly disagree, 2= disagree, 3= neutral, 4= agree, 5= strongly agree) |                                                                                         |   |   |   |   |   |
| B2.1                                                                                                                                                                                                                                                | Coronavirus pandemic has a serious impact on Entrepreneur's business.                   | 1 | 2 | 3 | 4 | 5 |
| B2.2                                                                                                                                                                                                                                                | Coronavirus pandemic leads to the closedown of the Entrepreneur's business permanently. | 1 | 2 | 3 | 4 | 5 |

|                                                                                             |                                                                                                                |   |   |   |   |   |
|---------------------------------------------------------------------------------------------|----------------------------------------------------------------------------------------------------------------|---|---|---|---|---|
| Read each of the following items carefully and decide how true the statement describes you. |                                                                                                                |   |   |   |   |   |
| <b>Instructions:</b> Please choose only one answer to each question.                        |                                                                                                                |   |   |   |   |   |
| (1= strongly disagree, 2= disagree, 3= neutral, 4= agree, 5= strongly agree                 |                                                                                                                |   |   |   |   |   |
| B2.3                                                                                        | Coronavirus pandemic has a negative impact on the work of employees' efficiency.                               | 1 | 2 | 3 | 4 | 5 |
| B2.4                                                                                        | Coronavirus pandemic impacts entrepreneur's business ability to buy inputs and sell outputs.                   | 1 | 2 | 3 | 4 | 5 |
| B2.5                                                                                        | Coronavirus pandemic impacts customer behaviour.                                                               | 1 | 2 | 3 | 4 | 5 |
| B2.6                                                                                        | Coronavirus pandemic is considered to be a chance to develop entrepreneurs' business operations in the future. | 1 | 2 | 3 | 4 | 5 |
| B2.7                                                                                        | Coronavirus pandemic forces you to work online.                                                                | 1 | 2 | 3 | 4 | 5 |
| B2.8                                                                                        | The government measures regarding the coronavirus pandemic are beneficial to your business.                    | 1 | 2 | 3 | 4 | 5 |
| B2.9                                                                                        | Coronavirus pandemic leads entrepreneurs to use social media to communicate with customers.                    | 1 | 2 | 3 | 4 | 5 |

### B3. ENTREPRENEURIAL EDUCATION

|                                                                                             |                                                                                     |   |   |   |   |   |
|---------------------------------------------------------------------------------------------|-------------------------------------------------------------------------------------|---|---|---|---|---|
| Read each of the following items carefully and decide how true the statement describes you. |                                                                                     |   |   |   |   |   |
| <b>Instructions:</b> Please choose only one answer to each question.                        |                                                                                     |   |   |   |   |   |
| (1= strongly disagree, 2= disagree, 3= neutral, 4= agree, 5= strongly agree                 |                                                                                     |   |   |   |   |   |
| B3.1                                                                                        | I have participated in subjects that could be considered entrepreneurial education. | 1 | 2 | 3 | 4 | 5 |
| B3.2                                                                                        | I like to take bold action by venturing into the unknown.                           |   |   |   |   |   |
| B3.3                                                                                        | I am willing to invest much time in something that might yield a high return.       | 1 | 2 | 3 | 4 | 5 |
| B3.4                                                                                        | I am willing to invest money in something that might yield a high return.           | 1 | 2 | 3 | 4 | 5 |
| B3.5                                                                                        | I tend to act 'boldly' in situations where risk is involved.                        | 1 | 2 | 3 | 4 | 5 |

|      |                                                                                                       |   |   |   |   |   |
|------|-------------------------------------------------------------------------------------------------------|---|---|---|---|---|
| B3.6 | In general, I have a strong inclination towards high-risk projects.                                   | 1 | 2 | 3 | 4 | 5 |
| B3.7 | Owing to the environment, I believe that bold, wide-ranging acts are necessary to achieve objectives. | 1 | 2 | 3 | 4 | 5 |
| B3.8 | I know how to get around the rules.                                                                   | 1 | 2 | 3 | 4 | 5 |

#### B4. ATTITUDE TOWARDS ENTREPRENEURSHIP

|                                                                                                                                                                                                                                                                    |                                                                            |   |   |   |   |   |
|--------------------------------------------------------------------------------------------------------------------------------------------------------------------------------------------------------------------------------------------------------------------|----------------------------------------------------------------------------|---|---|---|---|---|
| <p>Read each of the following items carefully and decide how true the statement describes you.</p> <p><b>Instructions:</b> Please choose only one answer to each question.</p> <p>(1= strongly disagree, 2= disagree, 3= neutral, 4= agree, 5= strongly agree)</p> |                                                                            |   |   |   |   |   |
| B4.1                                                                                                                                                                                                                                                               | Among the various career options, I would be anything but an entrepreneur. | 1 | 2 | 3 | 4 | 5 |
| B4.2                                                                                                                                                                                                                                                               | Being an entrepreneur would give me great satisfaction.                    | 1 | 2 | 3 | 4 | 5 |
| B4.3                                                                                                                                                                                                                                                               | Being an entrepreneur implies more advantages than disadvantages to me.    | 1 | 2 | 3 | 4 | 5 |
| B4.4                                                                                                                                                                                                                                                               | A career as an entrepreneur is totally attractive to me.                   | 1 | 2 | 3 | 4 | 5 |
| B4.5                                                                                                                                                                                                                                                               | My intention to be an entrepreneur.                                        | 1 | 2 | 3 | 4 | 5 |

#### B5. PERCEIVED ENTREPRENEURIAL ABILITIES

|                                                                                                                                                                                                                                                                    |                                                                                      |   |   |   |   |   |
|--------------------------------------------------------------------------------------------------------------------------------------------------------------------------------------------------------------------------------------------------------------------|--------------------------------------------------------------------------------------|---|---|---|---|---|
| <p>Read each of the following items carefully and decide how true the statement describes you.</p> <p><b>Instructions:</b> Please choose only one answer to each question.</p> <p>(1= strongly disagree, 2= disagree, 3= neutral, 4= agree, 5= strongly agree)</p> |                                                                                      |   |   |   |   |   |
| B5.1                                                                                                                                                                                                                                                               | I believe that I can identify new business opportunities.                            | 1 | 2 | 3 | 4 | 5 |
| B5.2                                                                                                                                                                                                                                                               | I believe that I can create ways to improve existing products for a new business.    | 1 | 2 | 3 | 4 | 5 |
| B5.3                                                                                                                                                                                                                                                               | I believe that I can create products or services that fulfil customers' unmet needs. | 1 | 2 | 3 | 4 | 5 |
| B5.4                                                                                                                                                                                                                                                               | I believe that I can successfully develop a new business.                            | 1 | 2 | 3 | 4 | 5 |
| B5.5                                                                                                                                                                                                                                                               | I believe that I can think creatively in business.                                   | 1 | 2 | 3 | 4 | 5 |

|                                                                                             |                                                                                       |   |   |   |   |   |
|---------------------------------------------------------------------------------------------|---------------------------------------------------------------------------------------|---|---|---|---|---|
| Read each of the following items carefully and decide how true the statement describes you. |                                                                                       |   |   |   |   |   |
| <b>Instructions:</b> Please choose only one answer to each question.                        |                                                                                       |   |   |   |   |   |
| (1= strongly disagree, 2= disagree, 3= neutral, 4= agree, 5= strongly agree                 |                                                                                       |   |   |   |   |   |
| B5.6                                                                                        | I believe that I can inspire those I work with to share my business vision.           | 1 | 2 | 3 | 4 | 5 |
| B5.7                                                                                        | I believe that I can conduct market analyses related to starting a new business.      | 1 | 2 | 3 | 4 | 5 |
| B5.8                                                                                        | I believe that I can formulate a set of actions in pursuit of business opportunities. | 1 | 2 | 3 | 4 | 5 |
| B5.9                                                                                        | I believe that I can identify potential new venture funding.                          | 1 | 2 | 3 | 4 | 5 |
| B5.10                                                                                       | I believe that I can identify a management team to develop a business.                | 1 | 2 | 3 | 4 | 5 |
| B5.11                                                                                       | I believe that I can build a management team to develop a business.                   | 1 | 2 | 3 | 4 | 5 |
| B5.12                                                                                       | I believe that I can develop business relationships with key people.                  | 1 | 2 | 3 | 4 | 5 |
| B5.13                                                                                       | I believe that I can tolerate unexpected changes in business conditions.              | 1 | 2 | 3 | 4 | 5 |
| B5.14                                                                                       | I believe that I can persist in the face of business setbacks.                        | 1 | 2 | 3 | 4 | 5 |
| B5.15                                                                                       | I believe that I can work productively under continuous pressure from work.           | 1 | 2 | 3 | 4 | 5 |
| B5.16                                                                                       | If I wanted to, I believe that I could successfully start my own business.            | 1 | 2 | 3 | 4 | 5 |

#### **B6. PERCEIVED ENVIRONMENT SUPPORT**

|                                                                                             |                                                                                              |   |   |   |   |   |
|---------------------------------------------------------------------------------------------|----------------------------------------------------------------------------------------------|---|---|---|---|---|
| Read each of the following items carefully and decide how true the statement describes you. |                                                                                              |   |   |   |   |   |
| <b>Instructions:</b> Please choose only one answer to each question.                        |                                                                                              |   |   |   |   |   |
| (1= strongly disagree, 2= disagree, 3= neutral, 4= agree, 5= strongly agree                 |                                                                                              |   |   |   |   |   |
| B6.1                                                                                        | The government is employing policies and procedures to encourage new venture creation.       | 1 | 2 | 3 | 4 | 5 |
| B6.2                                                                                        | Education programs on entrepreneurial information and business skills are always accessible. | 1 | 2 | 3 | 4 | 5 |

|                                                                                                                                                                                                                                                                    |                                                                                                            |   |   |   |   |   |
|--------------------------------------------------------------------------------------------------------------------------------------------------------------------------------------------------------------------------------------------------------------------|------------------------------------------------------------------------------------------------------------|---|---|---|---|---|
| <p>Read each of the following items carefully and decide how true the statement describes you.</p> <p><b>Instructions:</b> Please choose only one answer to each question.</p> <p>(1= strongly disagree, 2= disagree, 3= neutral, 4= agree, 5= strongly agree)</p> |                                                                                                            |   |   |   |   |   |
| B6.3                                                                                                                                                                                                                                                               | It is easy to get financial investment from venture capital.                                               | 1 | 2 | 3 | 4 | 5 |
| B6.4                                                                                                                                                                                                                                                               | Incubator facilities with new venture support services are always available for prospective entrepreneurs. | 1 | 2 | 3 | 4 | 5 |
| B6.5                                                                                                                                                                                                                                                               | It is easy to get Government start-up grants.                                                              | 1 | 2 | 3 | 4 | 5 |
| B6.6                                                                                                                                                                                                                                                               | Publicity and implementation of relevant policies are widespread.                                          | 1 | 2 | 3 | 4 | 5 |
| B6.7                                                                                                                                                                                                                                                               | Start-up funds offered by the school/government are accessible.                                            | 1 | 2 | 3 | 4 | 5 |
| B6.8                                                                                                                                                                                                                                                               | Family members are supportive of entrepreneurial ventures.                                                 | 1 | 2 | 3 | 4 | 5 |

## B7. ENTREPRENEURIAL INTENTIONS

|                                                                                                                                                                                                                                                                    |                                                                              |   |   |   |   |   |
|--------------------------------------------------------------------------------------------------------------------------------------------------------------------------------------------------------------------------------------------------------------------|------------------------------------------------------------------------------|---|---|---|---|---|
| <p>Read each of the following items carefully and decide how true the statement describes you.</p> <p><b>Instructions:</b> Please choose only one answer to each question.</p> <p>(1= strongly disagree, 2= disagree, 3= neutral, 4= agree, 5= strongly agree)</p> |                                                                              |   |   |   |   |   |
| B7.1                                                                                                                                                                                                                                                               | I am ready to do anything to be an entrepreneur.                             | 1 | 2 | 3 | 4 | 5 |
| B7.2                                                                                                                                                                                                                                                               | I will make every effort to establish my own business.                       | 1 | 2 | 3 | 4 | 5 |
| B7.3                                                                                                                                                                                                                                                               | I have never seriously considered becoming an entrepreneur.                  | 1 | 2 | 3 | 4 | 5 |
| B7.4                                                                                                                                                                                                                                                               | My professional goal is to be an entrepreneur.                               | 1 | 2 | 3 | 4 | 5 |
| B7.5                                                                                                                                                                                                                                                               | I am determined to create a business venture within the following 12 months. | 1 | 2 | 3 | 4 | 5 |
| B7.6                                                                                                                                                                                                                                                               | I am determined to create a business venture within the next 5 years.        | 1 | 2 | 3 | 4 | 5 |
| B7.7                                                                                                                                                                                                                                                               | I am determined to create a business venture within the next 10 years.       | 1 | 2 | 3 | 4 | 5 |



## B8. ENTREPRENEURIAL ACTION

|                                                                                             |                                                                               |   |   |   |   |   |
|---------------------------------------------------------------------------------------------|-------------------------------------------------------------------------------|---|---|---|---|---|
| Read each of the following items carefully and decide how true the statement describes you. |                                                                               |   |   |   |   |   |
| <b>Instructions:</b> Please choose only one answer to each question.                        |                                                                               |   |   |   |   |   |
| (1= strongly disagree, 2= disagree, 3= neutral, 4= agree, 5= strongly agree)                |                                                                               |   |   |   |   |   |
| B8.1                                                                                        | I have spent time outlining a business plan to pursue the product.            | 1 | 2 | 3 | 4 | 5 |
| B8.2                                                                                        | I have discussed marketing the product with advisors or potential investors.  | 1 | 2 | 3 | 4 | 5 |
| B8.3                                                                                        | I have contacted the customer segment as the initial introduction.            | 1 | 2 | 3 | 4 | 5 |
| B8.4                                                                                        | I have sought potential partners for exploiting this opportunity              | 1 | 2 | 3 | 4 | 5 |
| B8.5                                                                                        | I have invested my own money in researching the viability of the opportunity. | 1 | 2 | 3 | 4 | 5 |

## SECTION C: RECOMMENDATIONS

---

**C1: In your opinion, what are the perceived support mechanisms needed for a successful young entrepreneur within your business environment?**

.....

.....

.....

.....

.....

**C2: In your opinion, what are the challenges of being a young entrepreneur during the COVID-19 pandemic?**

.....

.....

.....

.....

You have completed the questionnaire!

**THANK YOU FOR YOUR TIME AND KIND COOPERATION.**
